# Supplementary material
Source: PubMed Central journal article supplement (PMC7033007)
Supplement: NIHMS1547077-supplement-1.pdf [file NIHMS1547077-supplement-1.pdf]

**Supplemental Table 1.** Antibodies and reagents.

| Flow Cytometry                              |                   |                                    |
|---------------------------------------------|-------------------|------------------------------------|
| $\alpha$ -muCD19-Pacific Blue™              | BioLegend         | Cat. # 115523 (Clone 6D5)          |
| $\alpha$ -muCD19-PE-Cy7                     | TONBO Biosciences | Cat. # 60-0193 (Clone 1D3)         |
| $\alpha$ -muB220-PE-Cy7                     | BioLegend         | Cat. # 103222 (RA3-6B2)            |
| $\alpha$ -muCD138-PE-Cy7                    | BioLegend         | Cat. # 142513 (Clone 281-2)        |
| $\alpha$ -muGL7-FITC                        | BioLegend         | Cat. # 144603 (Clone GL7)          |
| $\alpha$ -muCD40-PE                         | BioLegend         | Cat. # 124609 (Clone 3/23)         |
| $\alpha$ -muIgM-FITC                        | BioLegend         | Cat. # 406506 (Clone RMM-1)        |
| $\alpha$ -muIgM-PE                          | BioLegend         | Cat. # 406507 (Clone RMM-1)        |
| $\alpha$ -muIgD-APC                         | BioLegend         | Cat. # 405714 (Clone 11-26c.2a)    |
| $\alpha$ -muIgG1-FITC                       | BioLegend         | Cat. # 406606 (Clone RMG1-1)       |
| $\alpha$ -muIgG1-APC                        | BioLegend         | Cat. # 406609 (Clone RMG1-1)       |
| $\alpha$ -muIgG3-FITC                       | BD Biosciences    | Cat. # 553403 (Clone R40-82)       |
| $\alpha$ -muIgG3-BV421™                     | BD Biosciences    | Cat. # 565808 (Clone R40-82)       |
| $\alpha$ -muIgG2a-FITC                      | BD Biosciences    | Cat. # 553390 (Clone R19-15)       |
| $\alpha$ -muIgG2a-APC                       | BioLegend         | Cat. # 407110 (Clone RMG2a-62)     |
| $\alpha$ -muIgG2b-FITC                      | BioLegend         | Cat. # 406705 (Clone RMG2b-1)      |
| $\alpha$ -muIgA-FITC                        | eBioscience       | Cat. # 11-4204-82 (Clone mA-6E1)   |
| $\alpha$ -muIgE-biotin                      | BioLegend         | Cat. # 406904 (Clone RME-1)        |
| $\alpha$ -muCD3-APC-Cy7                     | BioLegend         | Cat. # 100221 (Clone 17A2)         |
| $\alpha$ -muCD4-APC                         | TONBO Bioscience  | Cat. # 20-0041 (Clone GK1.5)       |
| $\alpha$ -muCD4-PeCP-Cy5.5                  | eBioscience       | Cat. # 45-0042-82 (Clone RM4-5)    |
| $\alpha$ -muCD8b-PE                         | eBioscience       | Cat. # 12-0083-81 (Clone H35-17.2) |
| $\alpha$ -muCD8b-Horizon™ V500              | BD Biosciences    | Cat. # 560776 (Clone 53-6.7)       |
| $\alpha$ -muCD11b-biotin                    | BioLegend         | Cat. # 101204 (Clone m1/70)        |
| $\alpha$ -muCD11c-APC-Cy7                   | BioLegend         | Cat. # 117323 (Clone N418)         |
| $\alpha$ -RAB7-Alexa Flour® 647             | Abcam             | Cat. # 198337 (Clone EPR7589)      |
| Isotype control-Alexa Flour® 647            | Abcam             | Cat. # 199093 (Clone EPR25A)       |
| $\alpha$ -p-NF- $\kappa$ B p65-Alexa Flour® | Cell Signaling    | Cat. # 4886 (Clone 93H1)           |
| $\alpha$ -p-ERK1/2-BV421™                   | BioLegend         | Cat. # 369510 (Clone 6B8B69)       |
| Immunoblotting                              |                   |                                    |
| $\alpha$ -RAB7                              | Abcam             | Cat. # 137029 (Clone EPR7589)      |
| $\alpha$ -TRAF6                             | Abcam             | Cat. # 40675 (Clone EP592Y)        |
| $\alpha$ -ubiquitin (linkage-specific)      | Abcam             | Cat. # 179434 (Clone EPR8590-448)  |
| $\alpha$ -RAB5A                             | Abcam             | Cat. # 109534 (Clone EPR5438)      |
| $\alpha$ -HA tag                            | Sigma             | Cat. # 11867423001 (Clone 3F10)    |
| $\alpha$ - $\beta$ -actin                   | Sigma             | Cat. # A5441 (AC-15)               |
| $\alpha$ -GAPDH                             | GeneTex           | Cat. # 239 (Clone GT239)           |

|                                                  |                        |                                |
|--------------------------------------------------|------------------------|--------------------------------|
| $\alpha$ -TAK1                                   | Cell Signaling         | Cat. # 5206 (Clone D94D7)      |
| $\alpha$ -IKK $\gamma$                           | Cell Signaling         | Cat. # 2685 (polyclonal)       |
| $\alpha$ -TLR4                                   | Santa Cruz             | Cat. # sc-293072 (Clone 25)    |
| $\alpha$ -IRAK1                                  | Santa Cruz             | Cat. # sc-5288 (Clone F-4)     |
| Immunofluorescence staining                      |                        |                                |
| $\alpha$ -RAB7                                   | Abcam                  | Cat. # 137029 (Clone EPR7589)  |
| $\alpha$ -CD40                                   | Abcam                  | Cat. # 25298 (Clone 1C10)      |
| $\alpha$ -LAMP1                                  | ThermoFisher           | Cat. # 14-1071-82 (Clone 1D4B) |
| $\alpha$ -muCD40                                 | Abcam                  | Cat. # 25298 (Clone 1C10)      |
| $\alpha$ -ratIgG Alexa Flour <sup>®</sup> 488    | BioLegend              | Cat. # 405418                  |
| $\alpha$ -rabbitIgG Alexa Flour <sup>®</sup> 647 | Cell Signaling         | Cat. # 4414                    |
| $\alpha$ -ratIgG Alexa Flour <sup>®</sup> 488    | BioLegend              | Cat. # 405418                  |
| $\alpha$ -muIgG Alexa Flour <sup>®</sup> 594     | ThermoFisher           | Cat. # A-11005                 |
| $\alpha$ -muIgG Alexa Flour <sup>®</sup> 488     | BioLegend              | Cat. # 405319                  |
| Immunoprecipitation                              |                        |                                |
| $\alpha$ -RAB7                                   | Santa Cruz             | Cat. # sc-376362 (Clone B3)    |
| $\alpha$ -TRAF6                                  | Santa Cruz             | Cat. # sc-8409 (Clone D-10)    |
| $\alpha$ -RAB5A                                  | Santa Cruz             | Cat. # sc-46692 (Clone D-11)   |
| Normal mouse IgG                                 | Santa Cruz             | Cat. # sc-2025                 |
| ELISA                                            |                        |                                |
| $\alpha$ -muIgM-UNLB                             | SouthernBiotech        | Cat. # 1020-01                 |
| $\alpha$ -muIgG-UNLB                             | SouthernBiotech        | Cat. # 1030-01                 |
| $\alpha$ -muIgA-UNLB                             | SouthernBiotech        | Cat. # 1040-01                 |
| $\alpha$ -muIgM-biotin                           | SouthernBiotech        | Cat. # 1020-08                 |
| $\alpha$ -muIgG1-biotin                          | SouthernBiotech        | Cat. # 1070-08                 |
| $\alpha$ -muIgG2a-biotin                         | SouthernBiotech        | Cat. # 1080-08                 |
| $\alpha$ -muIgG2b-biotin                         | SouthernBiotech        | Cat. # 1090-08                 |
| $\alpha$ -muIgG3-biotin                          | SouthernBiotech        | Cat. # 1100-08                 |
| $\alpha$ -muIgA-biotin                           | SouthernBiotech        | Cat. # 1040-08                 |
| $\alpha$ -muIgG, HRP-linked                      | Cell Signaling         | Cat. # 7076S                   |
| $\alpha$ -rabbitIgG, HRP-linked                  | Cell Signaling         | Cat. # 7074S                   |
| Other flow cytometry reagents                    |                        |                                |
| Fixable Viability Dye eFlour <sup>™</sup>        | eBioscience            | Cat. # 65-0865-14              |
| Fixable Viability Dye eFlour <sup>™</sup>        | eBioscience            | Cat. # 65-0866-14              |
| NP <sub>23</sub> -PE                             | Biosearch Technologies | Cat. # N-5070-1                |
| APC BrdU flow kit                                | BD Biosciences         | Cat. # 552598                  |
| CellTrace <sup>™</sup> CFSE kit                  | ThermoFisher           | Cat. # C34554                  |
| CellTrace <sup>™</sup> Yellow kit                | ThermoFisher           | Cat. # C34573                  |
